# Supplementary material for: A fully integrated biomimetic microfluidic device for evaluation of sperm response to thermotaxis and chemotaxis
Source: Royal Society of Chemistry journal article supplement (doi:10.1039/d0lc00845a), 2021-01-01
Supplement: d0lc00845a2.pdf [file d0lc00845a2.pdf]

## **Electronic Supplementary Information**

### **A fully integrated biomimetic microfluidic device for evaluation of sperm response to thermotaxis and chemotaxis**

Yimo Yan<sup>ab</sup>, Boxuan Zhang<sup>ab</sup>, Qiqi Fu<sup>a</sup>, Jian Wu<sup>b</sup> and Ran Liu<sup>a,\*</sup>

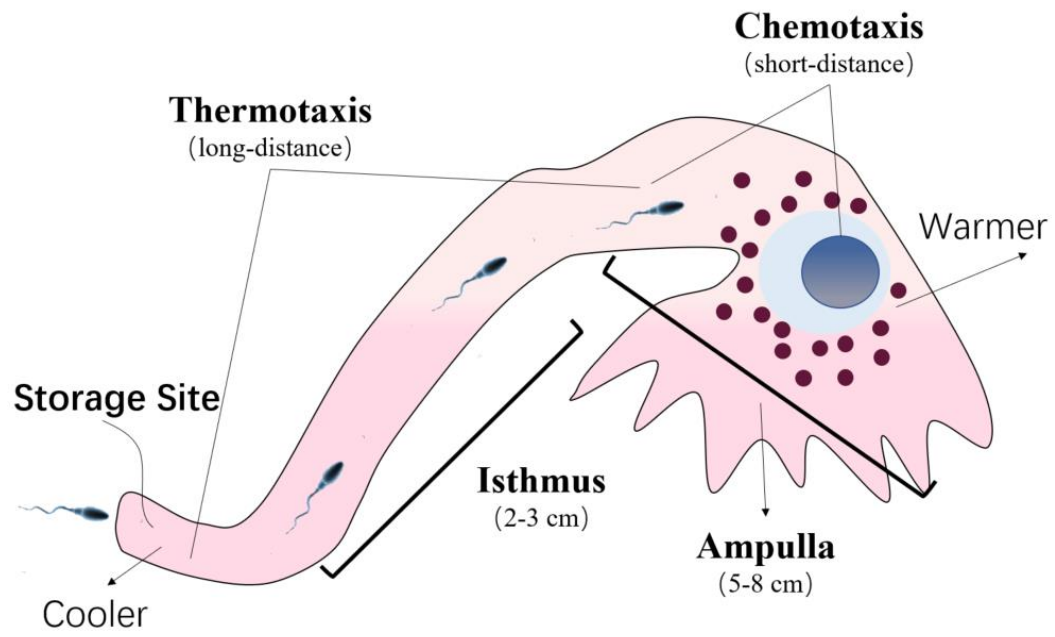

**Fig. S1** Sperm guidance mechanisms in the mammalian female genital tract.<sup>1</sup> (The scheme, which is not drawn to scale)

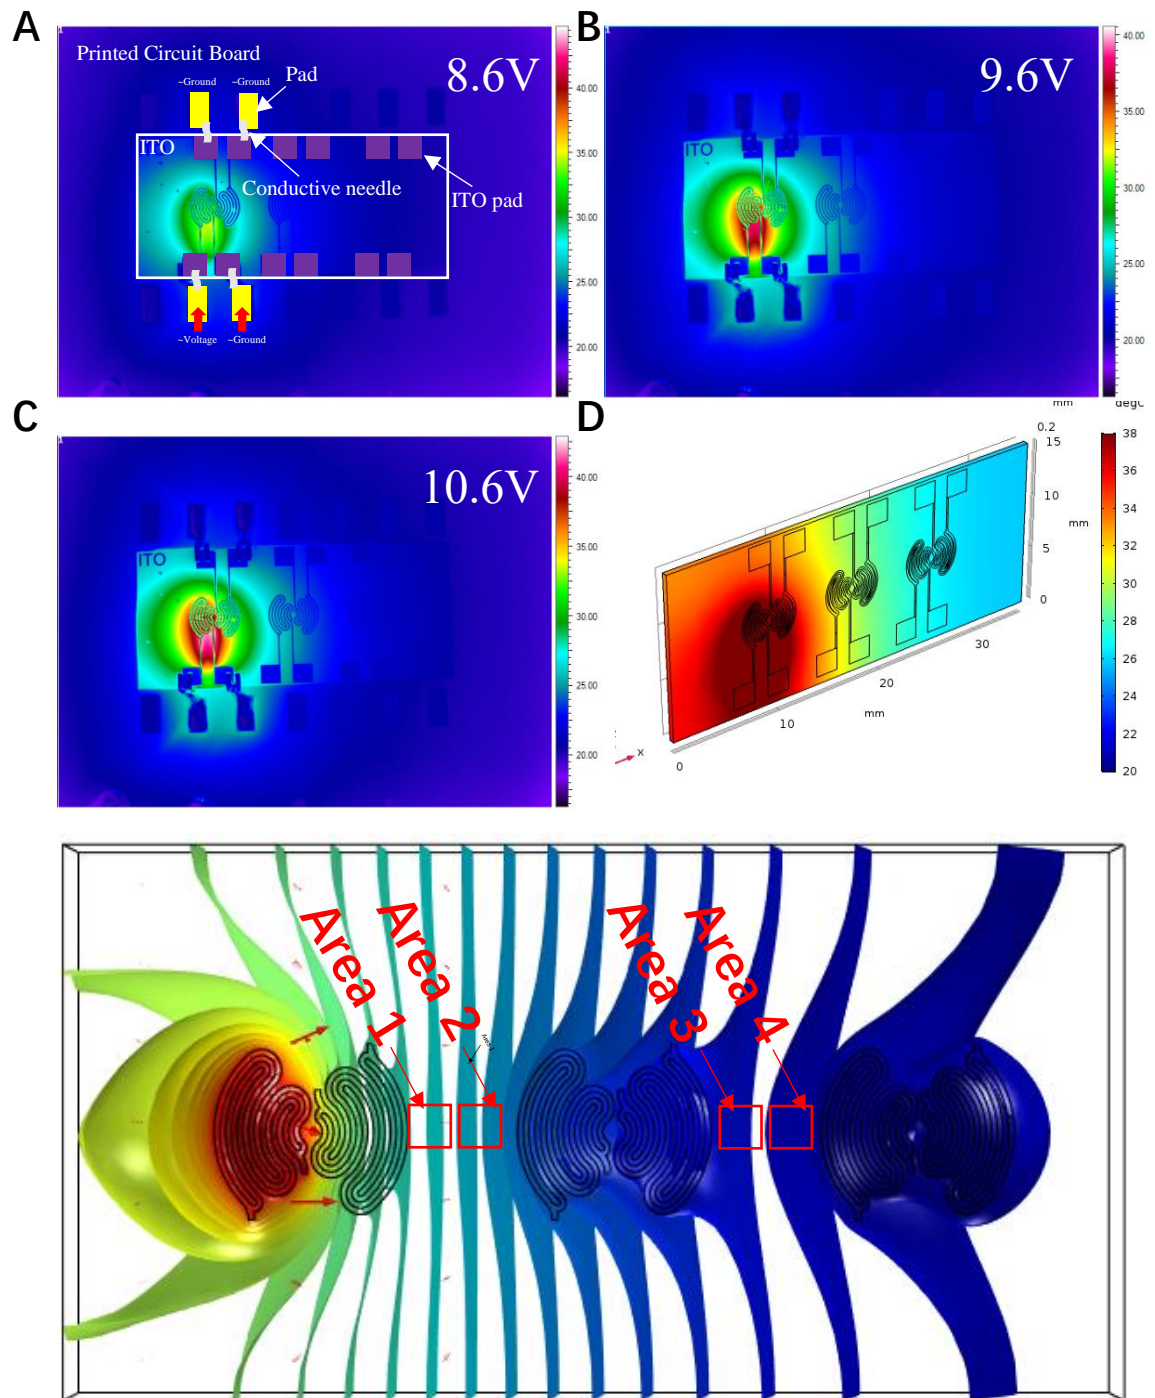

**Fig. S2** Thermal imaging and numerical simulation of temperature distribution. (A-C) Results of thermal gradient on the chip by micro-thermal imaging when applied different voltages. (D) Thermal simulation of ITO. (D) Distribution of isothermal plane

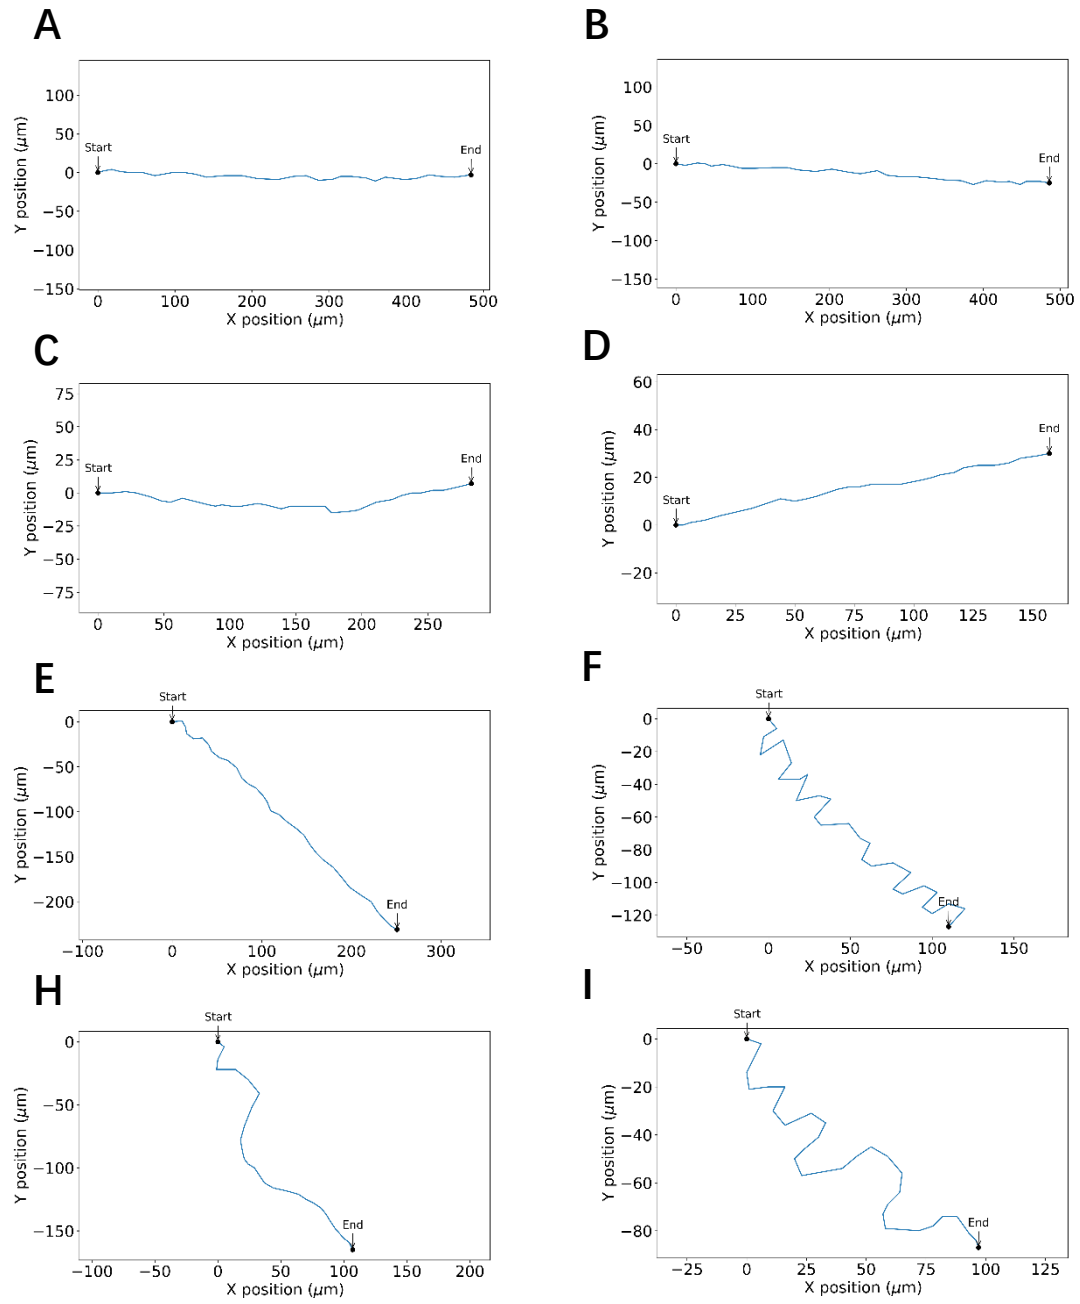

**Fig. S3** Trajectories of functional sperm in Area 1~4, Area 5,5a, Area 6,6a.

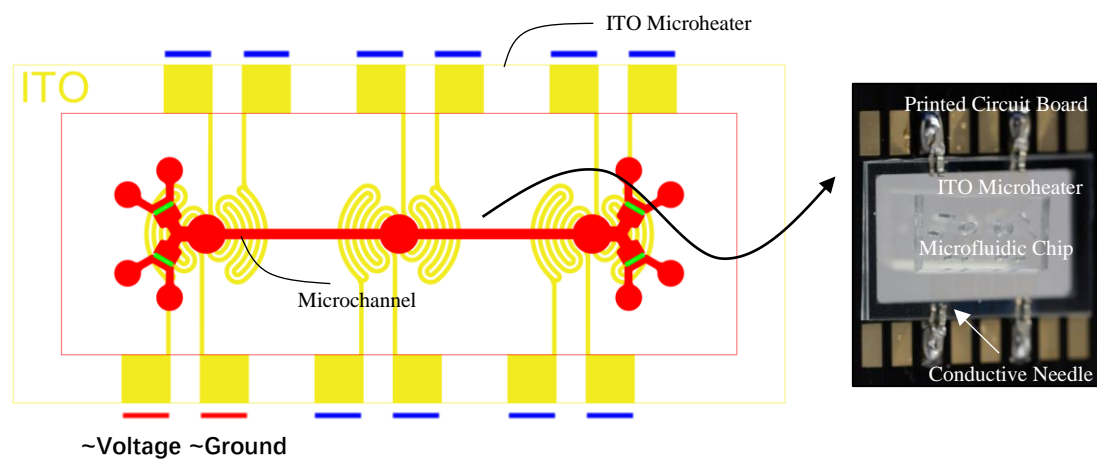

**Fig. S4** Schematic demonstrating ITO microheater assembling.

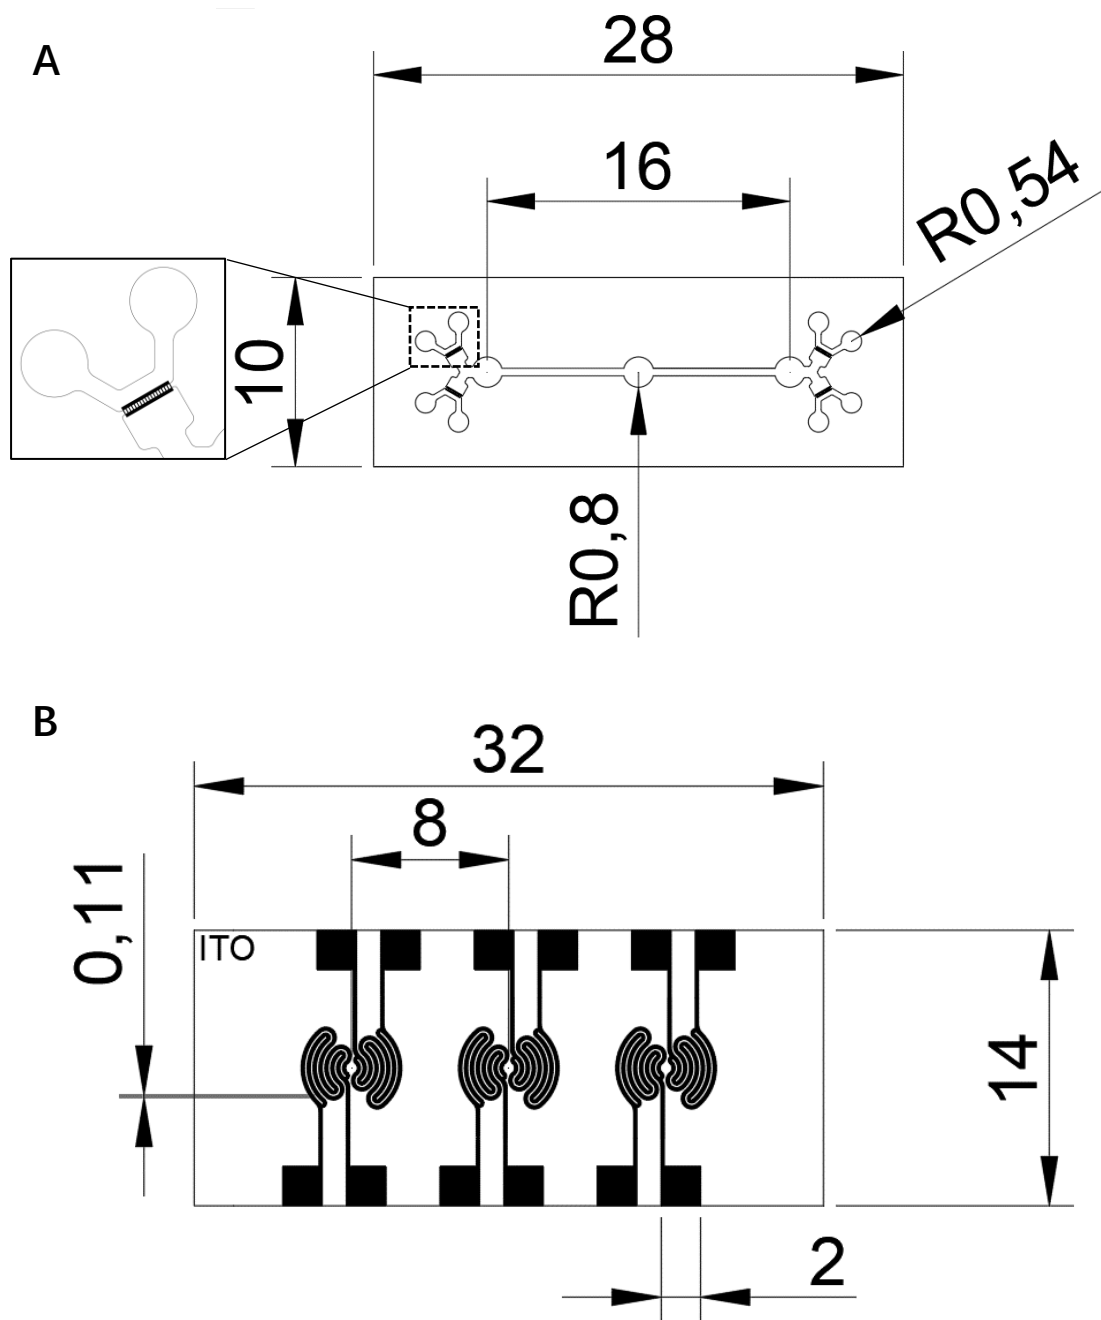

**Fig. S5** (A) The design and dimensions of microfluidic chip. (B) The design and dimensions of ITO. (in mm)

**Table S1.** Sperm concentration and sperm motility grading rates of anonymized patient semen samples used in this study

| Patient#                                                                     | 1      | 2      | 3      | 4      |
|------------------------------------------------------------------------------|--------|--------|--------|--------|
| <b>Serpm concentration</b><br>( $10^6 \times \text{mL}^{-1}$ )               | 140.56 | 290.51 | 94.38  | 107.71 |
| <b>Grade a</b><br>(Rapidly progressive<br>> 20 $\mu\text{m}/\text{second}$ ) | 31.52% | 34.68% | 38.39% | 40.88% |
| <b>Grade b</b><br>(slowly progressive<br>5-20 $\mu\text{m}/\text{second}$ )  | 15.36% | 21.33% | 41.84% | 16.41% |
| <b>Grade b</b><br>(Rapidly progressive<br>< 5 $\mu\text{m}/\text{second}$ )  | 5.80%  | 8.67%  | 3.14%  | 2.48%  |
| <b>Grade d</b><br>(Immotile)                                                 | 47.32% | 35.34% | 16.63% | 40.4%  |

**Table S2.** Material properties for the heat transfer analysis.<sup>2</sup>

| Material    | Density<br>(kg/m <sup>3</sup> ) | Specific heat<br>(J/kg·K) | Thermal conductivity<br>(W/m·K) |
|-------------|---------------------------------|---------------------------|---------------------------------|
| ITO         | 7000                            | 369.4                     | 3.2                             |
| Glass wafer | 2230                            | 753.789                   | 1.13                            |



**Table S3.** Meaning of the motility parameters.<sup>3</sup>

| <b>Parameter</b>                | <b>Meaning</b>                                                                                                                                                               |
|---------------------------------|------------------------------------------------------------------------------------------------------------------------------------------------------------------------------|
| Straight-line velocity<br>(VSL) | VSL is determined by finding the straight-line distance between the first and last points of the trajectory and correcting for time.                                         |
| Curvilinear velocity<br>(VCL)   | VCL is the distance travelled by the sperm along its curvilinear path/s and is calculated by finding the sum of the distances along the trajectory then correcting for time. |
| Average-path velocity<br>(VAP)  | VAP is the distance the sperm has traveled in the average direction of movement in the observation period.                                                                   |
| Linearity<br>(LIN)              | LIN is a comparison of the straight-line and curvilinear paths.                                                                                                              |
| Wobble<br>(WOB)                 | WOB is the expression of the relationship between the average and curvilinear paths                                                                                          |
| Straightness<br>(STR)           | STR is a comparison of the straight-line and average paths                                                                                                                   |

**Table S4.** Description of directionality-based parameters<sup>4</sup>

| Parameter             | Description                                                                                                                                                                                                                                                                                                                             |
|-----------------------|-----------------------------------------------------------------------------------------------------------------------------------------------------------------------------------------------------------------------------------------------------------------------------------------------------------------------------------------|
| $\Delta X$            | the net distance parallel to the gradient.<br>X > 0 :the number of sperm with a net distance parallel to gradient higher than zero.                                                                                                                                                                                                     |
| $\Delta Y$            | the net distance perpendicular to the gradient                                                                                                                                                                                                                                                                                          |
| $\Delta X/ \Delta Y $ | $\Delta X/ \Delta Y  > 1$ : the number of cells with the quotient between the net distance in X over the absolute value of the net distance in Y higher than the unit. That means sperm travel a longer distance in the direction of the temperature (chemical) gradient than in a gradient-less direction, perpendicular to the former |

**Movie S1.** Thermotaxis sperm selection process. Sperm employ free swimming and thermotactic mode swimming through the temperature gradient region.

## References

1. S. Perez-Cerezales, P. Ramos-Ibeas, O.S. Acuna, M. Aviles, P. Coy, D. Rizados, A. Gutierrez-Adan. *Biol Reprod*, 2018, **98**, 262-276.
2. Y.J. Ko, J.H. Maeng, S.Y. Hwang, Y. Ahn. *SLAS Technol*, 2018, **23**, 507-515.
3. S.T. Mortimer. *Hum Reprod Update*. 1997, **5**, 403-439.
4. M.E. Teves, F. Barbano, H.A. Guidobaldi, R. Sanchez, W. Miska, L.C. Giojalas. *Fertil Steril*, 2006, **86**, 745-749.
